# Supplementary material
Source: PubMed Central journal article supplement (PMC9797126)
Supplement: NIHMS1820625-supplement-1.pdf [file NIHMS1820625-supplement-1.pdf]

## Supporting Information

### Particle hydrogels decrease cerebral atrophy and attenuate astrocyte and microglia/macrophage reactivity after stroke

Elias Sideris<sup>1</sup>, Sophia Kioulaphides<sup>2</sup>, Katrina Wilson<sup>2</sup>, Aaron Yu<sup>1</sup>, Jun Chen, S Thomas Carmichael<sup>3</sup>, Tatiana Segura<sup>2\*\*</sup>

\*\* Corresponding author

Prof. Tatiana Segura

Tel.: +1 919-660-2901 Email Address: [Tatiana.segura@duke.edu](mailto:Tatiana.segura@duke.edu)

### Supplementary Figures

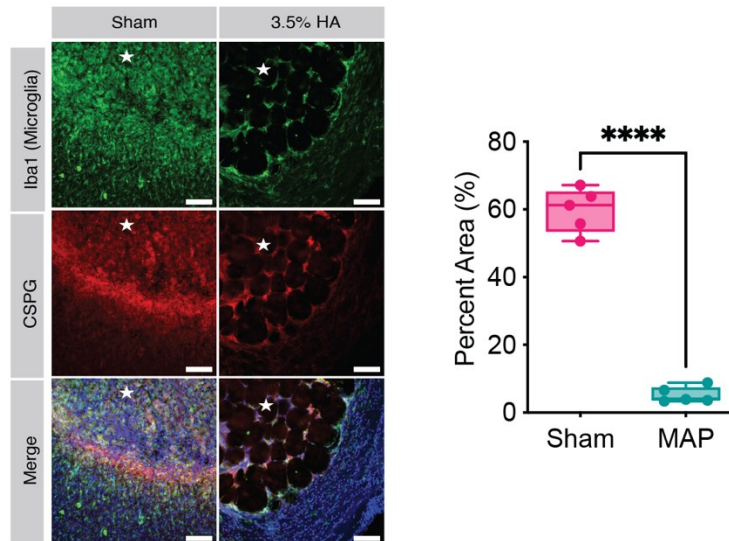

**Supplemental Figure 1.** IHC images showing microglia and CSPG deposition at 1 week post stroke. Quantification of positive area of CSPG in infarct region (star) comparing sham to MAP gel. All scale bars = 100 $\mu$ m. Statistical analysis was done in GraphPad Prism. Data were analyzed using a T-test and  $P < 0.05$ .

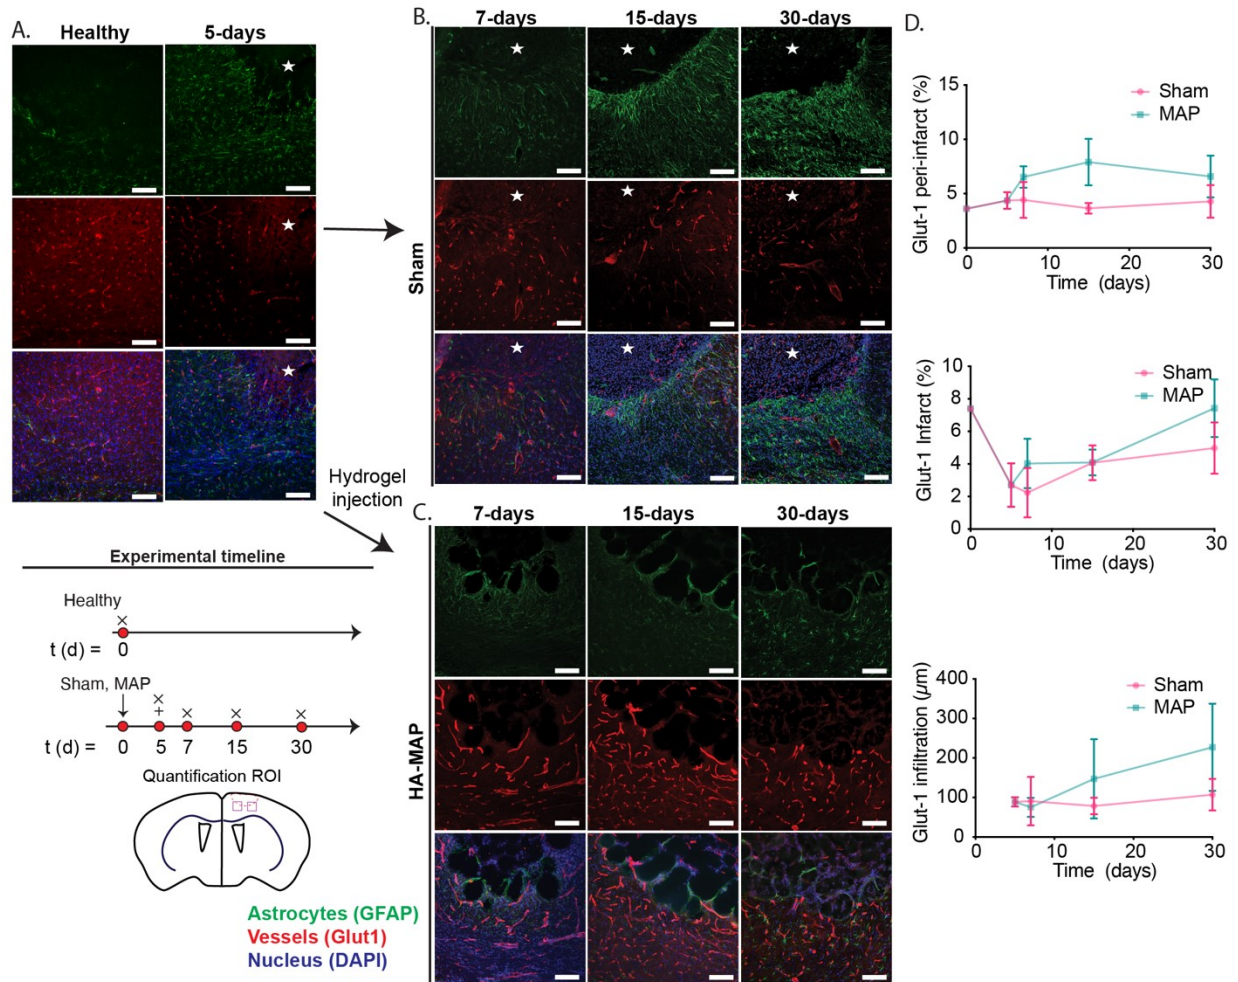

**Supplemental Figure 2.** A. IHC images showing reactive astrocytes (GFAP) and vessels (GLUT1) of healthy tissue and 5 days post stroke. B. IHC images of Sham stroke tissue showing reactive astrocytes (GFAP) and vessels (GLUT1) at 1-, 2-, 4-weeks post stroke. C. IHC images of MAP gel treated stroke tissue showing reactive astrocytes (GFAP) and vessels (GLUT1) at 1-, 2-, 4-weeks post stroke, D. Quantification of percent area of vessels (GLUT1) in the peri-infarct, infarct, and infiltration distance into infarct. All scale bars = 100µm. Statistical analysis was done in GraphPad Prism. Data were analyzed using a T- test and  $P < 0.05$ .

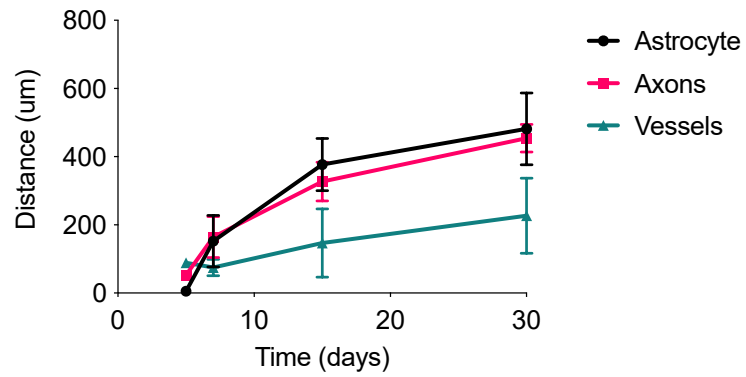

**Supplemental Figure 3.** Overlay of infiltration of astrocytes (GFAP), axons (NF200), and vessels (Glut1) into the infarct over time. Data is presented as mean and standard deviation with an average of 5 animals (n= 5).

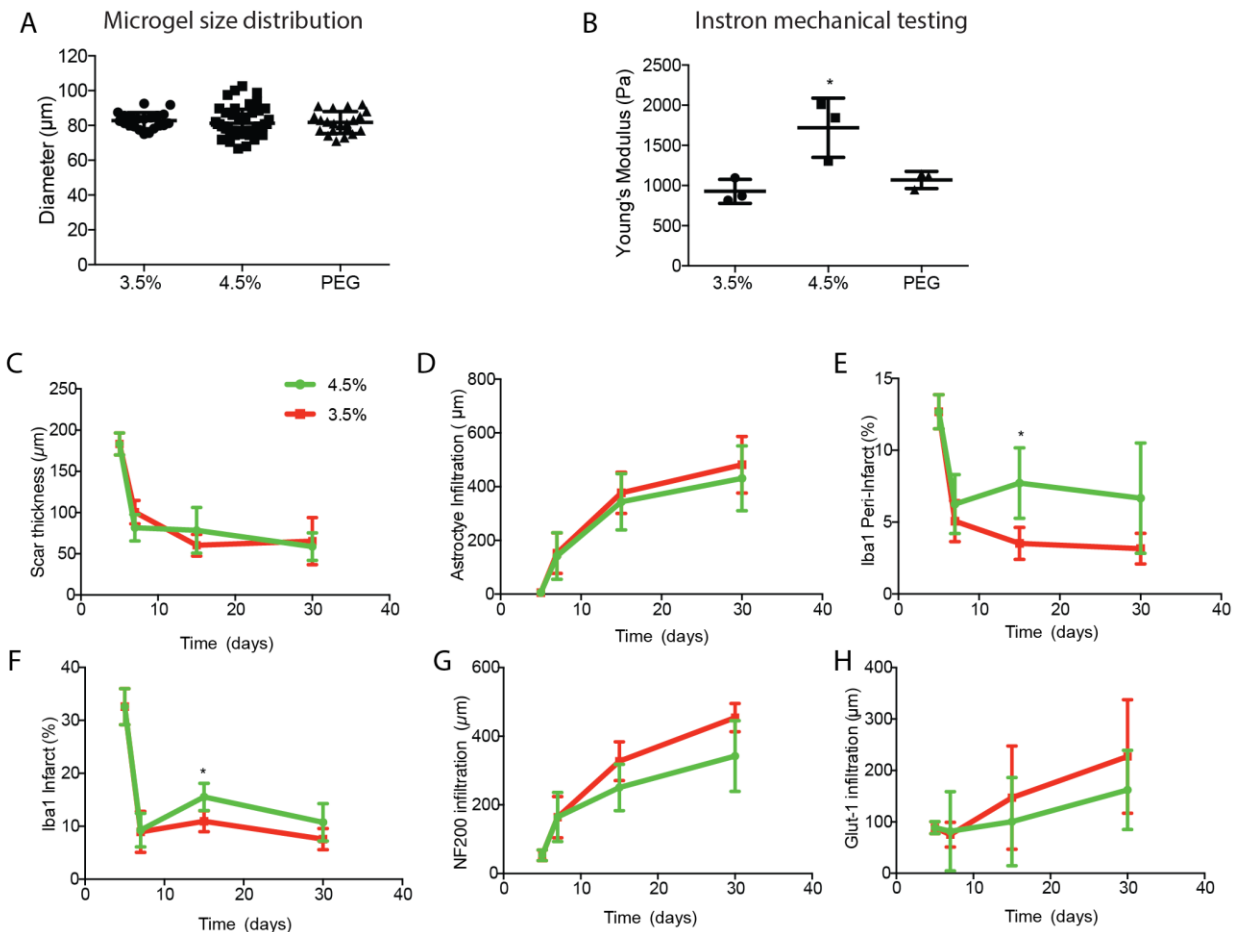

**Supplemental Figure 4.** A. Quantification of Young's modulus for 3.5% HA MAP, 4.5% HA MAP, and PEG MAP. B. Microgel size distribution for 3.5% HA MAP, 4.5% HA MAP, and PEG MAP. C. Quantification of scar thickness (GFAP) over time comparing 4.5% MAP and 3.5% MAP. D. Quantification of astrocyte infiltration (GFAP) into the infarct over time comparing 4.5% MAP and 3.5% MAP. E. Quantification of reactive microglia (Iba-1) percent area in the peri-infarct over time comparing 4.5% MAP and 3.5% MAP. F. Quantification of reactive microglia (Iba-1) percent area in the infarct over time comparing 4.5% MAP and 3.5% MAP. G. Quantification of axon (NF200) infiltration into the infarct over time comparing 4.5% MAP and 3.5% MAP. H. Quantification of vessel (GLUT1) infiltration into the infarct over time comparing 4.5% MAP and 3.5% MAP. Statistical analysis was done in GraphPad Prism. Data were analyzed using a two-way ANOVA analysis of variance followed by a Sidak *post-hoc* test and a 95% confidence interval. \* indicate  $P < 0.05$ .

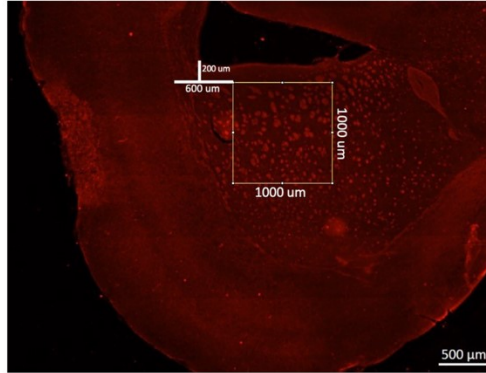

**Supplemental Figure 5.** Quantification of the number of nigrostriatal bundles stained with NF200 on the hemisphere ipsilateral to the stroke lesion. Measured bundles were confined to a 1000  $\mu\text{m}$  x 1000  $\mu\text{m}$  square that was 200  $\mu\text{m}$  from the top corner of the ventricle and 600  $\mu\text{m}$  away from the lower cortex surface. Measurements done on FIJI. Statistical analysis done on GraphPad Prism. Data was analyzed using a two-way ANOVA followed by a Tukey's multiple-comparisons test, \* indicates  $P < 0.05$ .
